# Red backgrounds have different effects on electrophysiological responses to fearful faces in groups with low and high autistic tendency

Eveline Mu<sup>1\*</sup>, Laila Hugrass<sup>2</sup>, David Crewther<sup>1</sup>

<sup>1</sup>Centre for Human Psychopharmacology, Swinburne University of Technology  
Melbourne, VIC, Australia

<sup>2</sup>School of Psychology and Public Health, La Trobe University, Melbourne, VIC, Australia

**\*Corresponding author:**

Dr Eveline Mu

Centre for Human Psychopharmacology

Swinburne University of Technology

John St, Hawthorn VIC 3122

emu@swin.edu.au

## 33 Abstract

34 Visual processing differences in the magnocellular pathway have been reported across the autistic  
 35 spectrum. On the basis that the firing of primate Type IV magnocellular cells is suppressed by  
 36 diffuse red backgrounds, several groups have used red backgrounds as a means to investigate  
 37 magnocellular contributions to visual processing in humans. Here, we measured emotional  
 38 identification accuracy, and compared the P100 and N170 responses from groups with low ( $n=21$ ;  
 39  $AQ<11$ ) and high ( $n=22$ ;  $AQ>22$ ) Autism Spectrum Quotient (AQ) scores, in response to low  
 40 (LSF) and high (HSF) spatially filtered fearful and neutral face stimuli presented on red and green  
 41 backgrounds. For the LSF stimuli, the low AQ group correctly identified fearful expressions more  
 42 often when presented on a red compared to a green background. The low AQ group also showed  
 43 red backgrounds reduced the effect of LSF fearful expressions on P100 amplitudes. In contrast, the  
 44 high AQ group showed that background colour did not significantly alter P100 responses to LSF  
 45 stimuli. Interestingly, red background reduced the effects of HSF stimuli for the high AQ group.  
 46 The effects of background color on LSF and HSF facial emotion responses were not evident for the  
 47 N170 component. Our findings suggest that presenting face stimuli on a red background alters both  
 48 magnocellular and parvocellular contributions to the P100 waveform, and that these effects differ  
 49 for groups with low and high autistic tendencies. In addition, a theoretical model for explaining the  
 50 temporal differences in facial emotion processing for low and high AQ groups is proposed.

51 *Keywords: red background, magnocellular, parvocellular, P100 and N170, autistic tendency, low*  
 52 *spatial frequency*

53

## 1. Introduction

Rapid visual processing of fearful facial emotion is important for social functioning and for responding to potential threats in our environments. Facial emotion processing is impaired for individuals with autism spectrum disorder, and these impairments extend to the neurotypical population for groups with high versus low levels of autistic personality traits. Hence it is important to understand the neural basis of rapid facial emotion processing deficits for people with high levels of autistic personality traits. When viewing emotional faces, people with autism (Baron-Cohen et al., 2000; Corbett et al., 2009) and high levels of autistic traits tend to exhibit abnormal activation in amygdala (Nummenmaa et al., 2012), a subcortical region involved in affective processing. One proposal is that abnormalities in the rapidly conducting magnocellular pathways from the retina to the amygdala may underlie facial emotion processing deficits in the broader autistic phenotype (Burt et al., 2017).

Studies on the neural processing of emotional stimuli have implicated the amygdala as a crucial component in mediating such affective processing (Adolphs et al., 2001; Amaral et al., 2003; Batty & Taylor, 2003; Blau et al., 2007; LeDoux, 2003; Morris, 1998; Stein et al., 2014). The amygdala receives input via many visual processing routes, subcortical and cortical, with outputs distributed widely across occipital and parietal regions (Krolak-Salmon et al., 2004; Kveraga et al., 2007; Pessoa, 2010). The most prominent hypothesis regarding the rapid activation of the amygdala is the ‘low road’ hypothesis (LeDoux, 1996), which postulates that the initial analysis of threatening stimuli bypasses the visual cortex utilizing a rapid subcortical pathway projecting from the retina to the amygdala via the superior colliculus and pulvinar (with latencies of ~80ms) (Garvert et al., 2014; McFadyen et al., 2017; Morris et al., 1999; Tamietto et al., 2012). The alternative ‘high road’ geniculovisual pathway (Pessoa & Adolphs, 2010), demonstrates a latency of ~140ms (McFadyen et al., 2017; Silverstein & Ingvar, 2015), and recent anatomical research in primate has demonstrated a direct retina-pulvinar-amygdala pathway (Mundinano, 2019). However, there have been few investigations into how amygdala activation modulates cortical visual processing.

The magnocellular and parvocellular pathways work in parallel, processing low-level visual features. The magnocellular pathway is a fast-conducting stream that is insensitive to colour when the luminance is balanced, has higher contrast sensitivity, and is involved in transient attention, while the slower parvocellular pathway performs is colour sensitive, has lower contrast sensitivity, and is involved in sustained responses (Derrington & Lennie, 1984; Kaplan & Shapley, 1986; Laycock et al., 2007; Nassi & Callaway, 2009). It has also been shown

that the two early visual pathways are sensitive to different spatial frequencies, with the magnocellular pathway being relatively sensitive to high temporal and low spatial frequency (LSF) information, whilst the parvocellular pathway is more sensitive to low temporal and high spatial frequency (HSF) information. Considering the evidence that fearful stimuli are rapidly processed subcortically (Carr, 2015; Garvert et al., 2014; Johnson, 2005; Morris et al., 1999; Öhman, 2005; Tamietto et al., 2012), it is plausible that this pathway processes coarse, LSF information (Burt et al., 2017). This is consistent with findings that low pass filtered emotional faces activate the amygdala more strongly than do high pass filtered faces (Vuilleumier et al., 2003). This suggests that the magnocellular channels are responsible for driving the rapid salient information to the amygdala. Some researchers (Burt et al., 2017; McCleery et al., 2007) have proposed that less efficient inputs from the magnocellular pathway might contribute to differences in face processing across the autistic personality spectrum.

Event related potentials (ERPs) from EEG recording have superior temporal resolution compared with other brain imaging techniques such as fMRI and are highly effective in identifying the timing of neural responses to emotional information. Two early ERP components studied in affective research are the P100 and N170. The P100 represents a positive early peak approximately 100ms post-stimulus onset. This peak reflects attentional gain (Hillyard & Anllo-Vento, 1998), and seems to be more sensitive to low-level visual information (Mangun, 1995). The N170 component is a negative deflection appearing approximately 170ms post-stimulus. It reflects a structural and featural encoding phase in face processing (Mangun, 1995). The P100 is recorded maximally over lateral occipital-parietal sites (Hillyard & Anllo-Vento, 1998), while N170 originates from regions associated with face and object processing, such as the fusiform gyrus, superior temporal sulcus and inferior, middle and superior temporal gyri (Henson et al., 2003). Visual detection of fearful faces elicits a strong occipital-parietal peak as rapidly as 80ms post-stimulus (Olivares et al. 2015) and 120-140ms post-stimulus (Eimer & Holmes, 2002; Pourtois et al., 2004; Vlamings et al., 2009) compared to neutral faces. This suggests that the amygdala may act as an early alerting mechanism which efficiently redirects visual attention to the threatening stimuli derived from the fast-magnocellular route (Dumas et al., 2013; Ohman, 2005).

Considering magnocellular and parvocellular neurons respond preferentially to LSF and HSF visual input, respectively (Benardete & Kaplan, 1999a, 1999b; Kaplan & Shapley, 1986), it is likely that LSF and HSF filtered faces bias visual processing towards the magnocellular and parvocellular routes, respectively. As such, previous electrophysiological evidence in typically developing populations suggests that P100 amplitudes are greater in response to LSF fearful

expressions than to neutral expressions, but HSF emotional expressions do not modulate P100 amplitudes (Pourtois et al., 2005; Vlamings et al., 2009). Some studies have found effects of LSF fearful expressions on N170 amplitudes (Vlamings et al., 2009), while others have not (Holmes et al., 2005; Pourtois et al., 2005). A recent EEG study showed that for participants with low AQ (Autism spectrum Quotient) scores, LSF fearful expressions have larger effects on P100 amplitudes than HSF fearful expressions, yet for people with high AQ scores, fearful expressions tended not to influence P100 amplitudes (Burt et al., 2017). This supports the notion that fearful face processing deficits in ASD could be related to magnocellular pathway abnormalities in processing LSF visual input (Corradi-Dell'Acqua et al., 2014; Laycock et al., 2007).

Single cell studies by Wiesel and Hubel (1966) in lateral geniculate nucleus provided evidence that presenting stimuli on a red background suppresses spiking activity in a class (Type IV) of magnocells (despite the general colour insensitivity of the magnocellular class). These cells have been reported in a number of locations along the magnocellular pathway, including the retinal ganglion cells (de Monasterio, 1978), lateral geniculate nucleus (Wiesel & Hubel, 1966) and striate cortex (Livingstone & Hubel, 1984).

Several studies in human have borrowed from the primate results and have used red surrounds to investigate the effects of suppressing magnocellular firing on human perception and action, and have inferred a similar effect in humans based on behavioural performance change in response to red light, typically a weakened or reduced response in healthy controls (Awasthi et al., 2016; Breitmeyer & Breier, 1994; West et al., 2010; but see Hugrass et al., 2018). West et al. (2010) found a temporal precedence effect for fearful faces that are presented on a green background, but this effect is diminished when the stimuli are presented on a red background of the same luminance. The authors interpreted this finding in terms of suppression of magnocellular input - superior colliculus - pulvinar route to the amygdala. However, it is unlikely that a red surround would disrupt early processing via this route, because unlike Type III magnocellular neurons, Type IV magnocellular neurons do not project to the superior colliculus (de Monasterio, 1978), but project solely to the LGN.

Interestingly, recent studies have shown that red surrounds have different effects on visual processing for groups with atypical magnocellular processing, such as schizophrenia and high trait schizotypy (Bedwell et al., 2013; Bedwell et al., 2006, 2018; Bedwell & Orem, 2008) dyslexia (Chase et al., 2003; Edwards et al., 1996). For example, Bedwell et al. (2013) examined the effects of a red background on P100 responses to a high contrast check pattern. For people with low trait schizotypy, a red background produced the expected reduction in P100 amplitude, whereas for

people with high schizotypy, P100 amplitudes did not differ with red and green backgrounds. Similarities in magnocellular functioning in individuals with ASD and schizophrenia (Butler et al., 2005; Kim et al., 2006; Laycock et al., 2007), and the findings that individuals with high AQ and high SPQ scores share a common social factor (Dinsdale et al., 2013; Ford & Crewther, 2014), implies that groups with high versus low AQ groups are likely to show differential processing of stimuli with red versus green backgrounds.

Based on West et al.'s (2010) results, it was predicted that low AQ participants would be less accurate in discriminating between fearful and neutral expressions when LSF face stimuli are presented on a red background, than when presented on a green background. Based on the existing literature (Awasthi et al., 2016; West et al., 2010), it was expected that red background would reduce the effects of LSF fearful expression on P100 and N170 amplitudes in the low AQ group. Finally, combining the evidence that both AQ and schizotypy are associated with magnocellular pathway abnormalities (reviewed Laycock et al., 2007), that the AQ and SPQ scales share a common factor (Dinsdale et al., 2013; Ford & Crewther, 2014) and that red backgrounds have different effects on visual processing for groups with low and high schizotypy (Bedwell et al., 2013), it was anticipated that a red background would not influence the amplitude of early EEG responses to fearful faces in the high AQ group.

## 2. Materials and methods

### 2.1. Participants

Participants were recruited within the university and local community through distributed advertisements and word-of-mouth. The inclusion criteria required participants to be aged between 18 and 40, have normal (or corrected-to-normal) vision, and have no history of neurological conditions. Prior to the EEG session, participants completed an online version of the AQ questionnaire (Baron-Cohen et al., 2001). Of the 135 AQ respondents, 46 individuals who scored either low or high on the AQ questionnaire were recruited to participate in the EEG study at Swinburne University of Technology, Melbourne, Australia. After screening the EEG data for excessive noise ( $>75\mu\text{V}$  signals on a high proportion of trials), 43 participants (25 females) were included in the final sample (age range: 18-31 years,  $M = 23.8$ ;  $SD = 4.18$ ). The Swinburne University Human Research Ethics Committee approved the experimental procedures, and all participants provided written, informed consent prior to participation in accordance with the Declaration of Helsinki.

### 2.2. Autism-Spectrum Quotient

The AQ (Baron-Cohen et al., 2001) is a self-report questionnaire measuring the degree to which an adult in the general population with normal intelligence has the traits associated with ASD. The 50-item instrument evaluates social skills, attention switching, attention to detail, communication, and imagination. Allocation into the low and high AQ groups was based on the population mean ( $M = 18.10$ ,  $SD = 10.81$ ) for AQ scores (Ruzich et al., 2015). The low ( $n=21$ ;  $AQ < 11$ ) and high ( $n=22$ ;  $AQ > 22$ ) AQ groups had mean scores of 8.48 ( $SD = 2.69$ ) and 27.71 ( $SD = 6.17$ ), respectively.

### 2.3. Visual stimuli

Stimuli were created for our 2 (facial emotion) x 2 (spatial frequency) x 2 (background colour) design. The greyscale fearful and neutral face stimuli (see Figure 1) were taken from the 7 different identities (4 female) from the Nimstim Face Set (Tottenham et al., 2009). To create LSF ( $< 2$  cycles/degree) and HSF ( $> 6$  cycles/degree) faces, all images were filtered with high-pass and low-pass Gaussian filters (Burt et al., 2017). All pictures were fitted within a frame of 500 x 700 pixels, with the external features (hair, neck and ears) removed. To control for low-level contrast differences between the neutral and fearful faces, only closed-mouth faces were used. The LSF and HSF images were then equated for luminance and RMS contrast using a custom Matlab script (The Mathworks, Natick, MA).

The tasks were created and displayed using VPixx software (Version 3.20, [www.vpixmap.com](http://www.vpixmap.com)), and presented on a 27 x 48cm LCD monitor (60Hz refresh rate). The luminance of the green background ( $CIE_x = 0.33$ ,  $CIE_y = 0.60$ ) was psychophysically matched to that of the red background ( $CIE_x = 0.33$ ,  $CIE_y = 0.60$ ,  $L = 31.9 \text{ cd/m}^2$ ).

**Figure 1.** Visual stimuli. The task involved the presentation of a scrambled face (1800ms) on a coloured background, followed by a spatially filtered fearful or neutral face (500ms). After the face disappeared, a central fixation cross cued the participant to report the facial emotion. The experiment was separated into four blocks, in which the fearful and neutral face stimuli were a) LSF on a green background, b) HSF on a green background, c) LSF on a red background and d) HSF on a red background.

### 2.4. Equiluminance



216 The red and green backgrounds were matched for luminance using a centrally presented  
217 heterochromatic minimum flicker task, coded in VPixx (VPixx Technologies, Montreal, CA). Red  
218 luminance was held constant while subjects adjusted the green luminance to minimize the  
219 perception of red-green flicker (Fiorentini et al., 1996). The point of equiluminance was obtained by  
220 averaging four adjustment trials. In all subjects, the adjusted green luminance values were close to  
221 the physical luminance of the red background ( $M$  difference = 0.54 cd/m<sup>2</sup>,  $SE$  = 0.01 cd/m<sup>2</sup>).

## 222 2.5. Test procedure

223 Participants were seated in a quiet dark room, at a viewing distance of 70cm from the screen. All  
224 participants started with the flicker photometry task, followed by a short training block of 10 trials  
225 prior to the experiment. To prevent fatigue, the experiment was split into four blocks of 120 trials  
226 (two blocks each for the red and green background conditions, with LSF and HSF fearful and  
227 neutral faces randomised within each block). The order of the blocks was counterbalanced across  
228 participants. In total, there were 60 replications for each of the eight experimental conditions (2  
229 background colour x 2 spatial frequency x 2 facial emotion). For all trials a scrambled face  
230 (1800ms) was presented before the target face and central fixation cross (500ms). After the face  
231 disappeared, participants used a RESPONSEPixx button box, connected to DATAPixx hardware  
232 (VPixx Technologies, Montreal, CA), to report whether the expression was fearful (right button) or  
233 neutral (left button). The fixation-cross remained on the screen until the participant made a  
234 response. Instructions to participants emphasised the importance of accurate decisions over speed.  
235 Participants were allowed to rest between blocks. The testing session lasted approximately one  
236 hour.

## 237 2.6. VEP recording and analysis

238 EEG recordings were made from a 64-channel Quickcap using Scan 4.5 acquisition software  
239 (Neuroscan, Compumedics) from parietal, temporal and occipital regions (OZ, O1, O2, O3, P3, P4,  
240 P5, P6, P7, P8, PO1, PO2, PO3, PO4, PO5, PO6, PO7 and PO8). Fz was used as the ground  
241 electrode site and the linked mastoids were used as the reference channel (Vlamings et al., 2009).  
242 EOG electrodes were placed vertically at the upper and lower orbital regions of the right eye to  
243 monitor ocular artifact. Electrode impedances were kept below 10KΩ.

244 EEG data were processed using Brainstorm software (Tadel et al., 2011). Each subject's  
245 data were band-pass filtered from 0.1-30Hz and re-referenced to the average reference. The vertical  
246 EOG channels were used to detect and remove eye-blink artifacts from the data using Signal Space  
247 Projection. Epochs were extracted from -200 – 400ms relative to stimulus presentation, and



baseline subtraction was applied (-200 – 0ms). All epochs containing amplitudes larger than 75 $\mu$ V were removed from the analysis. Separate VEP averages were computed for each of the 2 (spatial frequency) by 2 (background colour) by 2 (facial emotion) conditions, for the low and high AQ groups. On average, 57.6 ( $SD = 3.4$ ) out of 60 trials in each condition survived data cleaning processes, with no significant differences in the number of trials retained across conditions (all comparisons  $p > 0.32$ ), or across participants in the low versus high AQ groups (all comparisons  $p > 0.16$ ).

To improve the signal with respect to noise, the mean responses were extracted for a cluster of occipitotemporal electrodes from the right hemisphere (P8, PO8). These electrodes produced the greatest amplitude P100-N170 responses, and the electrode locations are consistent with previous literature showing a right hemisphere advantage for the processing of faces and emotion expressions (Burt et al., 2017; Bruno Rossion, 2014; Vlamings et al., 2009). P100 and N170 amplitudes were then extracted using a routine programmed in LabVIEW (National Instruments, USA). P100 amplitude was defined as the maximum amplitude in the time-window from 80 to 140ms after stimulus presentation. N170 amplitude was defined as the negative peak amplitude in the time-window from 150 to 210ms after stimulus presentation. The data were screened for outliers. The data were screened for outliers. For the analysis of P100 amplitude, data from one low AQ participant was excluded due to an outlier for the red background LSF neutral condition.

The peak amplitude and latency data were analysed using SPSS Statistics software (SPSS, Version 20, IBM) and JMP (Version 10.0). In order to investigate the effects of background (green, red) on the ERP emotional responses (fear, neutral) with respect to AQ scores (low, high), we conducted separate 2 (background) by 2 (emotion) by 2 (AQ) mixed design ANOVAs for LSF and HSF stimuli, with P100 and N170 amplitudes as the dependent variables. Separate analyses were conducted for LSF and HSF stimuli, on the basis that this reasonably separates magnocellular and parvocellular contributions (Pourtois et al., 2005; Vlamings et al., 2009). Bonferroni corrections ( $\alpha = 0.0125$ ) for multiple comparisons were applied to all follow-up t-tests.

### 3. Results

#### 3.1. Behavioral results

Means and standard errors for emotion identification accuracies are presented in Figure 2. Accuracy was defined as the percentage of trials when fearful and neutral facial expressions were correctly reported. For both AQ groups, mean accuracy was above 90% for all conditions. Response times were not subject to statistical analysis as participants were instructed to decide as accurately as possible, only after the target face had disappeared (in order to minimise movement artifact during

281 EEG recording). Thus, the values obtained would not truly reflect reaction times to the stimuli. Due  
 282 to corrupted and/or missing key-press files, only data from 20 low AQ and 20 high AQ participants  
 283 were included in the analyses.

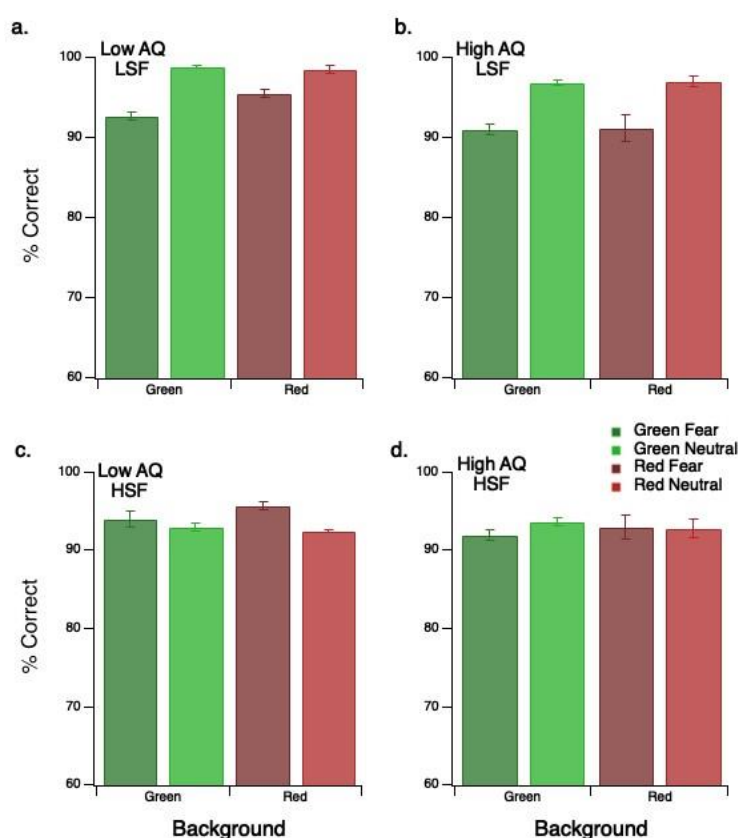

284

285 **Figure 2.** Mean accuracy levels for emotion identification. Results are presented in separate  
 286 panels for the low AQ group with (a) LSF and (c) HSF stimuli on green and red backgrounds, and  
 287 for the high AQ group with (b) LSF and (d) HSF stimuli on green and red backgrounds. Results for  
 288 the fearful and neutral faces are presented in the darker and lighter bars, respectively. Error bars  
 289 represent within-subject 1 SEM.

290

291 For LSF conditions, the three-way (background x emotion x AQ) ANOVA produced a  
 292 significant main effect of emotion ( $F(1,37)=12.45, p=0.001, \eta_p^2=0.25$ ), with greater accuracy for  
 293 neutral compared to fearful faces. There was also a significant interaction between background,  
 294 emotion and AQ ( $F(1,37)=4.45, p=0.041, \eta_p^2=0.11$ ). To explore this interaction, two separate 2  
 295 (background) x 2 (emotion) ANOVAs were performed for the low and high AQ groups. For the  
 296 LSF condition, there was a significant background and emotion interaction for the low AQ group  
 297 ( $F(1,19)=10.41, p=0.004, \eta_p^2=0.35$ ), with greater accuracy for fearful faces presented on a red  
 298 background than on a green background. For the high AQ group, there was a significant main effect  
 299 of emotion ( $F(1,18)=6.87, p=0.017, \eta_p^2=0.28$ ), with greater accuracy for LSF neutral faces across  
 300 both background conditions.

For the HSF conditions, no significant main effects or interactions were evident for either the low or high AQ group.

### 3.2. VEP results

Grand average ERPs for fearful and neutral, LSF and HSF faces are presented in Figure 3, with separate panels for LSF and HSF conditions for low AQ (Figure 3a and 3c) and for high AQ (Figure 3b and 3d) groups.

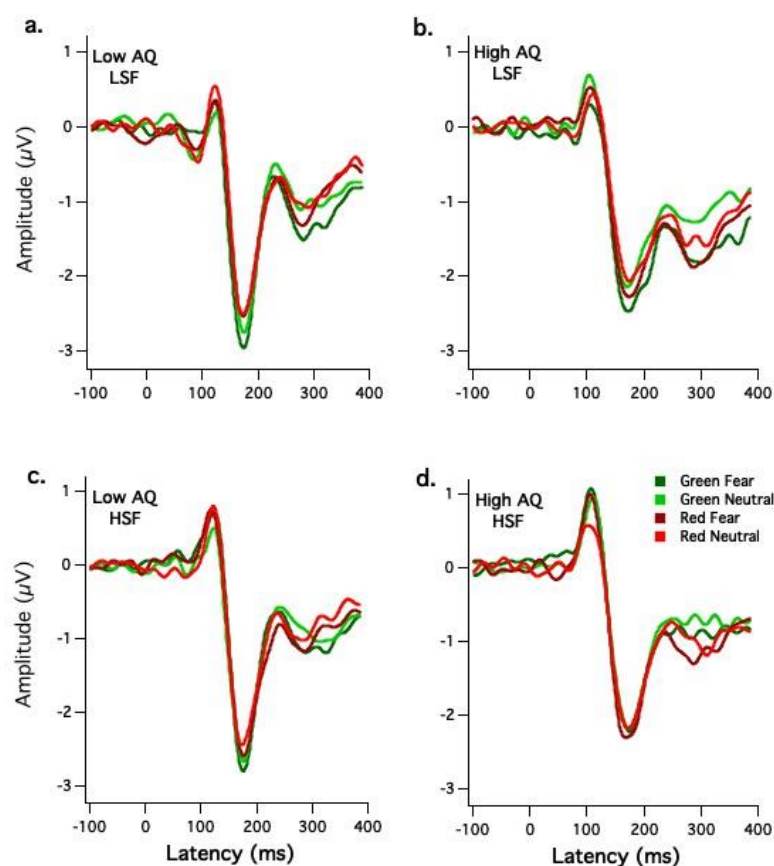

**Figure 3.** Grand averaged cluster waveforms in response to LSF and HSF fearful and neutral faces. The separate panels illustrate responses from the low AQ group for (a) LSF and (c) HSF stimuli, and the high AQ group for (b) LSF and (d) HSF stimuli. For the red background conditions, the dark and light red lines represent fearful and neutral faces, respectively. For the green background conditions, the dark and light green lines represent fearful and neutral faces, respectively.

#### 3.2.1. P100 amplitude

Figure 4 illustrates the effects of background colour on P100 amplitudes for the low and high AQ groups with LSF (Figures 4a and 4b) and HSF (Figure 4c and 4d) face stimuli. Separate (background) x 2 (emotion) x 2 (AQ) ANOVAs were performed for the LSF and HSF conditions.

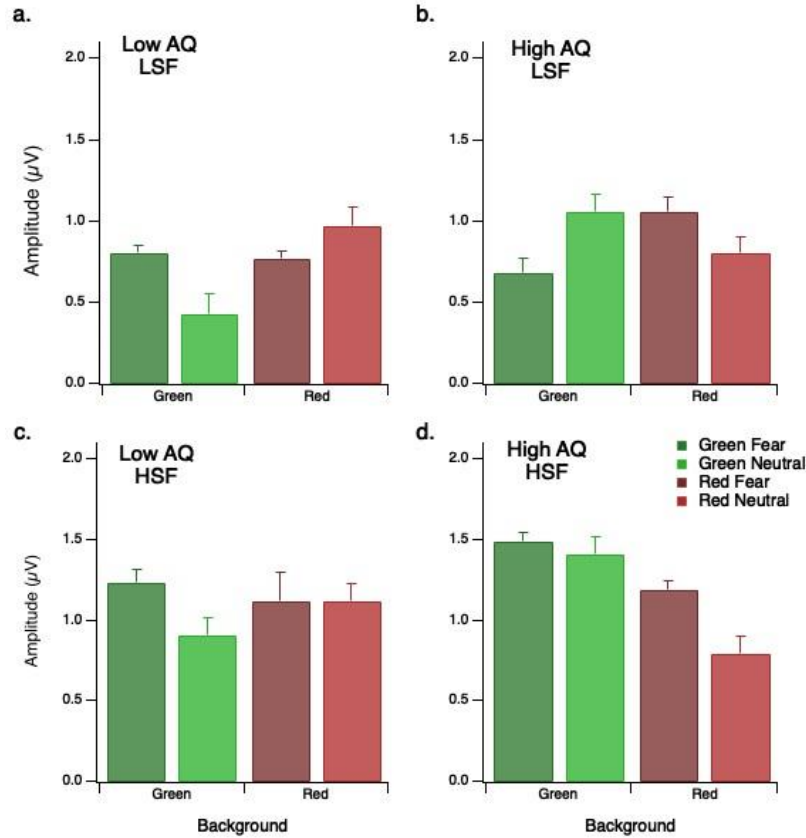

**Figure 4.** Mean P100 amplitudes. Results are presented in separate panels for the low AQ group with (a) LSF and (c) HSF stimuli, and for the high AQ group with (b) LSF and (d) HSF stimuli. Results for the fearful and neutral faces are presented in the darker and lighter bars, respectively. Error bars represent within-subject 1SEM.

For the LSF condition, there was a significant three-way interaction between the effects of background colour, emotion and AQ ( $F(1,40)=4.29$ ,  $p=0.045$ ,  $\eta_p^2=0.97$ ). To investigate this interaction, separate follow-up tests of simple main effects were conducted for the low and high AQ groups (Bonferroni corrected). For the low AQ group, mean P100 amplitudes were higher for LSF fearful faces than LSF neutral faces when the background was green ( $\bar{x}_{diff} = 0.24 \mu V$ ,  $p = 0.024$ ), but not when the background was red ( $\bar{x}_{diff} = 0.02 \mu V$ ,  $p = 0.703$ ). For the high AQ group, mean P100 amplitudes for LSF fearful and neutral faces differed in the opposite direction, but not significantly, for either the green background ( $\bar{x}_{diff} = 0.24 \mu V$ ,  $p=0.068$ ) or red background ( $\bar{x}_{diff}=0.18 \mu V$ ,  $p=0.294$ ) conditions.

For the HSF condition, the main effect of emotion was approaching significance ( $F(1,41)=3.86, p=0.056$ ), with a tendency for P100 amplitudes to be greater for fearful faces compared to neutral faces. The interaction between background and AQ was also approaching significance ( $F(1,41)=3.51, p=0.068$ ). To explore this interaction, follow-up tests of simple main effects were conducted (Bonferroni corrected). On average, P100 amplitudes were higher in response to stimuli presented on a green background than on a red background for the high AQ group ( $\bar{x}_{\text{diff}} = 0.31 \mu\text{V}, p = 0.027$ ) but not for the low AQ group ( $\bar{x}_{\text{diff}} = 0.05 \mu\text{V}, p = 0.708$ ).

### 3.2.1.1. Principle component and factor analysis

To obtain a clearer understanding of the relationships between the stimulus variables as they apply to the hypothetical framework, the P100 amplitudes for LSF fearful and neutral stimuli presented on green and red backgrounds were subjected to a post-hoc principal components analysis (PCA) using maximum likelihood estimation/Varimax rotation. Due to the well-reported relationship of LSF and magnocellular functioning, and the aim of the current study, we conducted this further analysis on LSF stimuli only. Components with Eigenvalues  $>1.0$  were retained as substantial representations of the variation in the model. Component loadings below 0.3 were suppressed in order to report only important component contributions (Tabachnick and Fidell, 2013).

Initially, the AQ scores were included in the PCA in order to establish which other variables that the AQ scores related to. The rotated component loading for P100 amplitudes to LSF stimuli plus AQ are presented in Table 1 below. Scores below 0.3 are not shown. The PCA resulted in a three-component solution (explaining 77% variance), with only component 1 being AQ dependent.

**Table 1.**

Rotated component loadings for LSF P100 amplitudes using Maximum Likelihood/Varimax methods

|                          | Component 1 | Component 2 | Component 3 |
|--------------------------|-------------|-------------|-------------|
| <b>AQ score</b>          | 0.500       |             |             |
| <b>Green LSF Fear</b>    |             | 0.788       |             |
| <b>Green LSF Neutral</b> | 0.801       |             |             |
| <b>Red LSF Fear</b>      | 0.322       |             | 0.548       |
| <b>Red LSF Neutral</b>   |             |             | 0.557       |

*Note: Scores below 0.3 are not shown in order to report only important component contributions.*

The individual component scores were calculated and presented as a 3D scatter plot (see Figure 5). Membership of the low AQ and high AQ groups is shown by grey cubes and black spheres respectively. The separation of most of the low AQ data points from the high AQ data points in the 3-factor space clearly shows that autistic tendency plays a role in the strength of the P100 response for LSF stimuli.

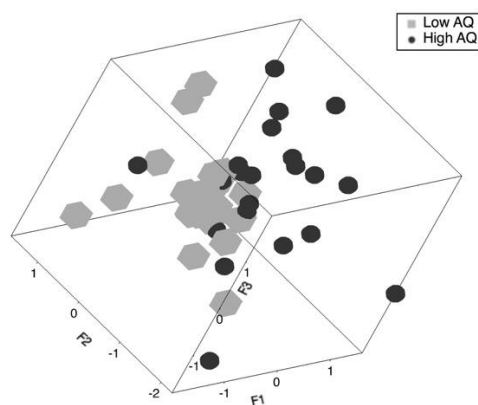

**Figure 5.** 3D component plot of low AQ (grey cube) and high AQ (black sphere) groups plotted as a function of the 3 components. The view chosen shows a clear separation of low and high AQ data points

To further explore factors underlying AQ differences, factor analysis was performed separately for low and high AQ groups, as shown in Table 2 below. Principal components were used as the factoring method with prior communality indexed by squared multiple correlations (SMC), and rotation using Varimax. Only two components reached significance on the Kaiser criterion and hence a two-component solution was developed. For the low AQ group, the first factor coded for fearful faces across red and green backgrounds, while the second factor coded neutral faces across red and green backgrounds (with negative correlations between the amplitudes). In contrast, for the high AQ group, the first factor coded predominately for green backgrounds, with a weaker input from the red neutral variable while the second factor coded for red backgrounds, across all facial emotional expressions.

**Table 2.**

Separate rotated exploratory factor loadings with Varimax rotation for low and high AQ groups

|                          | Low AQ   |          | High AQ  |          |
|--------------------------|----------|----------|----------|----------|
|                          | Factor 1 | Factor 2 | Factor 1 | Factor 2 |
| <b>Green LSF Fear</b>    | 0.483    |          | 0.579    |          |
| <b>Green LSF Neutral</b> |          | 0.509    | 0.479    |          |
| <b>Red LSF Fear</b>      | 0.632    |          |          | 0.539    |
| <b>Red LSF Neutral</b>   |          | -0.507   | 0.408    | 0.463    |

*Note: Scores below 0.3 are not shown in order to report only important component contributions.*

In summary, the analysis demonstrated that the strength of P100 responses for LSF face stimuli is dependent on autistic tendency. It also revealed a different factor structure in which for the low AQ group the factors separated on the basis of emotion while for the high AQ group, they separated more on the basis of background colour.

### 3.2.2. N170 Amplitude

Bar graphs for mean N170 amplitudes, separated by autistic tendency group and spatial frequency are presented in Figure 5. For the LSF condition, the 2 (background) x 2 (emotion) x 2 (AQ) ANOVA produced a significant main effect of emotion ( $F(1,41)=8.201$ ,  $p=0.007$ ,  $\eta_p^2=0.167$ ), with greater N170 amplitude for fearful faces compared to neutral faces. There were no other main effects or interactions.

For the HSF condition, there were no significant main effects or interactions.



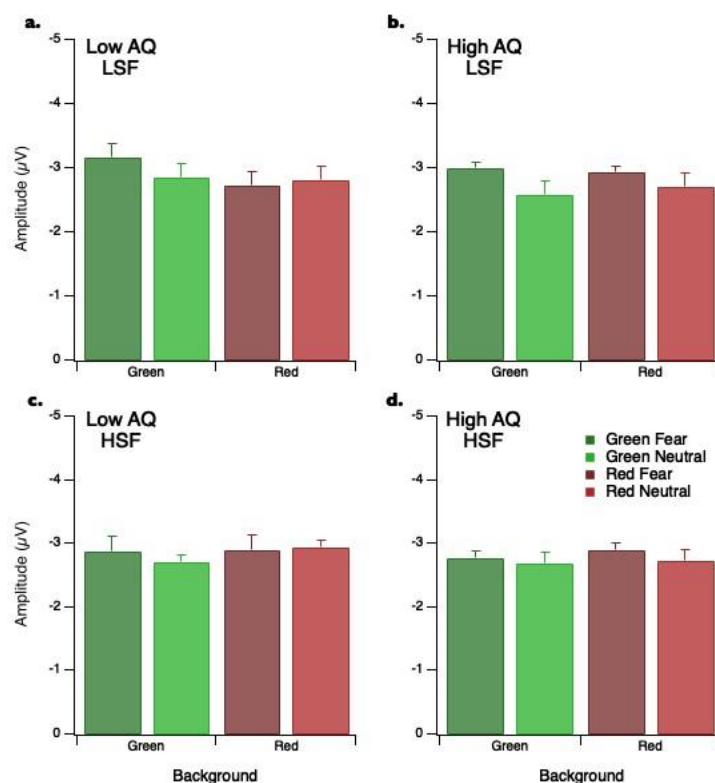

**Figure 6.** Mean N170 amplitudes. Results are presented in separate panels for the low AQ group with (a) LSF and (c) HSF stimuli, and for the high AQ group with (b) LSF and (d) HSF stimuli. Results for the fearful and neutral faces are presented in the dark and light grey bars, respectively. Error bars represent within-subject 1SEM.

#### 4. Discussion

This is the first electrophysiological investigation into the effects of a red background on early evoked activity to fearful and neutral facial expressions for groups with low and high autistic tendency. For the LSF face stimuli, there was a complex interaction between the effects of background colour, facial emotion and autistic tendency on P100 amplitudes. This suggests that the effects of a red background on early evoked responses to fearful versus neutral faces may vary for groups with low and high levels of autistic tendency. These effects of background color on responses to facial emotion were not evident for the N170 component. Hence, our discussion focuses on interpreting the P100 responses and providing a theoretical model for explaining the differences in facial emotion processing for groups with low and high AQ scores.

The behavioral data suggest that both the low and high AQ groups were able to accurately identify the facial expressions as neutral or fearful, regardless of the background colour or spatial frequency of the stimuli. For the low AQ group, we found that LSF fearful expressions were identified correctly more often when the faces were presented on a red background than on a green background. This was initially a surprising result in light of West et al.'s (2010) finding that a red

background extinguishes the temporal precedence for detecting fearful facial expressions. However, given the length of the stimulus exposure duration (500ms), our behavioral results are unlikely to reflect rapid processing mechanisms that are important for temporal order judgements.

Previous studies have suggested that the magnocellular pathway allows for rapid transmission of salient information, such as threat, to the amygdala (de Gelder et al., 2011; Méndez-Bértolo et al., 2016; Morris et al., 2001; Vuilleumier et al., 2003). On the basis that magnocellular responses are biased towards LSF input (Benardete & Kaplan, 1999a, 1999b; Kaplan & Shapley, 1986), and that type IV magnocellular cells are suppressed by red backgrounds (Wiesel & Hubel, 1966), we used both spatial frequency and background colour to probe magnocellular involvement in P100 responses to fearful faces. For the low AQ group, the finding that P100 amplitudes were greater for LSF fearful versus LSF neutral faces on a green background supports evidence of a magnocellular pathway involvement in the rapid processing of threat relevant stimuli. Furthermore, our finding that this difference is extinguished when the faces are presented on a red background indicated that suppressing magnocellular input (specifically Type IV magnocellular input) reduces early processing for threatening versus neutral face stimuli. However, these effects were relatively small, which indicates that using a red background does not greatly influence the variance in P100 responses to emotional faces. By contrast, for the high AQ group, there was no significant difference in mean P100 amplitudes for LSF fearful and LSF neutral faces, regardless of whether they were presented on green or red backgrounds. This indicates that for those with high levels of autistic tendency, Type IV magnocellular cells are unlikely to contribute to early processing differences for fearful versus neutral faces.

There are similar magnocellular abnormalities in both AQ and schizotypy (reviewed Laycock et al., 2007), and the AQ and SPQ scales share a common factor (Dinsdale et al., 2013; Ford & Crewther, 2014). Our finding that a red background had different effects on P100 responses to LSF faces for groups with low and high AQ appears to parallel those of Bedwell et al. (2013) who found a red background to reduce P100 amplitude for people with low schizotypy, but no change in P100 amplitude to the red background for people with high schizotypy. Findings from the current study and Bedwell et al. imply that a red background may have different effects on individuals with differing magnocellular function, such as those with low and high AQ. However, such comparisons should be considered with caution as the stimuli employed in the current study and Bedwell et al. are not identical. Specifically, considering we presented facial emotional stimuli we can assume that subcortical projections to the amygdala may influence P100 amplitude, whereas Bedwell et al. presented checkerboard stimuli, which are unlikely to drive a strong amygdala response.

459 There are also recent reports in primate of wide-field retinal ganglion cells that project  
460 directly to the medial sub-division of the inferior pulvinar (Kwan et al., 2019), findings yet to be  
461 confirmed in human. For instance, if input to the amygdala is dominated by the LGN-cortical  
462 pathways, one might expect a red background to suppress rapid amygdala reactivity to affective  
463 stimuli. While there is certainly mixing of information from magnocellular and parvocellular  
464 pathways after V1, and there is a strong V1 – pulvinar – extrastriate cortex feed of information  
465 (Ahmadlou et al., 2018; Lakatos et al., 2016), such circuitous associations would be arguably less  
466 spatial frequency specific and slower (McFadyen et al., 2017), thus less likely to influence P100  
467 responses to emotional face stimuli. In comparison, direct pulvinar–hMT connections would be  
468 expected to involve rapid processing (Kwan et al., 2019). If input to the amygdala is strongly  
469 influenced by these subcortical pathways, one would not expect red backgrounds to reduce rapid  
470 amygdala reactivity to fearful facial expressions.

471 Interestingly, however, the PCA/factor analysis performed on the P100 responses for LSF  
472 face stimuli showed a factor structure separated on the basis of stimulus emotion for the low AQ  
473 group, but on the basis of background color for the high AQ group. This indicates that we cannot  
474 exclude the notion that Type IV magnocellular cells are likely to contribute to early processing  
475 differences for those with high levels of autistic tendency. Rather, we need to examine how  
476 magnocellular inputs to the dorsal cortical stream (the source of the P100 response) might differ  
477 anatomically or physiologically as a function of autistic tendency.

478 A potential mechanism to explain general differences in P100 amplitude responses for the  
479 low and high AQ group to facial emotional stimuli is an amygdala-driven contrast-gain modulation.  
480 Contrast gain effects of amygdala hyper-response to fearful expressions in humans with autism  
481 (Amaral et al., 2003), and in animal models of ASD (Markram et al., 2008) are reported to increase  
482 hMT and extrastriate early response. Tadayonnejad et al (2016) used effective connectivity analysis  
483 of the pulvinar to show that people with generalised social anxiety disorder demonstrated causally  
484 increased influential dynamics between pulvinar and higher order visual cortical regions. Similarly,  
485 pulvinar manipulation of occipital cortex visual responses is supported by studies on  
486 pharmacological agonism and antagonism of pulvinar (Purushothaman et al., 2012) and also the  
487 model of amygdala modulation of visual response via pulvinar and thalamic reticular (TRN) (John  
488 et al., 2016). Furthermore, such modulation of thalamic gain by amygdala stimulation has received  
489 a boost through optogenetic studies in mice (Aizenberg et al., 2019), where optogenetic activation  
490 of amygdala amplified tone evoked responses in auditory cortex.

491 Thus, a model consistent with red backgrounds producing different effects on P100  
492 amplitudes for high versus low AQ individuals can be plausibly constructed via a combination of 1)  
493 a hyper responsive amygdala reaction to fear or anxiety generating situations in those with ASD or  
494 high AQ (Dalton et al., 2005; Markram et al., 2008); 2) response gain modulation of pulvinar by  
495 direct amygdala projections to the TRN; 3) red background suppression of LGN thalamic drive to  
496 hMT causing a greater balance of pulvinar-hMT drive and a resultant fear driven emotional  
497 attention. Therefore, the differential effects seen with high versus low AQ groups may be  
498 explainable through a different weighting of thalamic inputs to parietal cortex through pulvinar and  
499 LGN, or from a differential degree of amygdala driven contrast gain modulation, exerted at the  
500 pulvinar, for those with high versus low AQ scores.

501 The literature focuses on the idea that the suppressive effects of red backgrounds are only  
502 related to magnocellular functioning (Awasthi et al., 2016; Breitmeyer & Breier, 1994; West et al.,  
503 2010; Wiesel & Hubel, 1966), while not considering if there are effects on the spatially and  
504 chromatically sensitive parvocellular system. To this point, we found that a red background  
505 produced a reduction in P100 amplitudes with HSF stimuli for the high AQ group. This finding is  
506 reminiscent of the results of Hugarass et al. (2018), who examined the effects of red background on  
507 magnocellular and parvocellular non-linear VEP signatures and found red background to suppress  
508 parvocellular generated temporal nonlinearity VEPs, and not did influence magnocellular generated  
509 VEP signatures. Considering the parvocellular pathway is highly sensitive to (red/green) color,  
510 Hugarass et al. suggested that red backgrounds may increase temporal sensitivity in the parvocellular  
511 pathway, with an immediate prediction of enhanced L-M color fusion frequencies. Taken together,  
512 one should be cautious when utilising red backgrounds to study magnocellular functioning as they  
513 may affect parvocellular functioning too.

514 In conclusion, we compared ERPs in response to fearful and neutral faces for groups with  
515 low and high levels of autistic tendency. We used red and green backgrounds and LSF and HSF  
516 stimuli in order to probe the role of magnocellular visual input in driving early cortical responses to  
517 fearful stimuli. For the low AQ group, P100 amplitudes were higher for the LSF fearful than neutral  
518 face when the stimuli were presented on a green background, but not when the faces were presented  
519 on a red background. However, for the high AQ group, P100 amplitudes were higher for HSF  
520 fearful than neutral faces when presented on a green background, but not when faces were  
521 presented on a red background. Our findings suggest that presenting face stimuli on a red  
522 background alters both magnocellular and parvocellular contributions to the P100 waveform, and  
523 that these effects vary for groups with low and high levels of autistic tendency

## 524 5. Author contribution statement

525 EM created the experimental design, performed testing and data collection, and drafted the  
526 manuscript. EM and LH analysed the data. LH and DC contributed to manuscript editing. All  
527 authors contributed equally to interpreting the results.

## 528 6. Conflict of interest statement

529 The authors declare that research was conducted in the absence of any commercial or financial  
530 relationships that could be construed as a potential conflict of interest.

## 531 7. References

- 532 Adolphs, R., Sears, L., & Piven, J. (2001). Abnormal Processing of Social Information from Faces  
533 in Autism. *Journal of Cognitive Neuroscience*, 13(2), 232–240.  
534 <https://doi.org/10.1162/089892901564289>
- 535 Ahmadi, M., Zweifel, L. S., & Heimel, J. A. (2018). Functional modulation of primary visual  
536 cortex by the superior colliculus in the mouse. *Nature Communications*, 9(1), 1–13.  
537 <https://doi.org/10.1038/s41467-018-06389-6>
- 538 Aizenberg, M., Rolón-Martínez, S., Pham, T., Rao, W., Haas, J. S., & Geffen, M. N. (2019).  
539 Projection from the Amygdala to the Thalamic Reticular Nucleus Amplifies Cortical Sound  
540 Responses. *Cell Reports*, 28(3), 605–615.e4. <https://doi.org/10.1016/j.celrep.2019.06.050>
- 541 Amaral, D. G., Bauman, M. D., & Mills Schumann, C. (2003). The amygdala and autism:  
542 Implications from non-human primate studies: Amygdala and autism. *Genes, Brain and*  
543 *Behavior*, 2(5), 295–302. <https://doi.org/10.1034/j.1601-183X.2003.00043.x>
- 544 Awasthi, B., Williams, M. A., & Friedman, J. (2016). Examining the role of red background in  
545 magnocellular contribution to face perception. *PeerJ*, 4, e1617.  
546 <https://doi.org/10.7717/peerj.1617>
- 547 Baron-Cohen, S., Ring, H. A., Bullmore, E. T., Wheelwright, S., Ashwin, C., & Williams, S. C. R.  
548 (2000). The amygdala theory of autism. *Neuroscience & Biobehavioral Reviews*, 24(3),  
549 355–364. [https://doi.org/10.1016/S0149-7634\(00\)00011-7](https://doi.org/10.1016/S0149-7634(00)00011-7)

550 Baron-Cohen, S., Wheelwright, S., Skinner, R., Martin, J., & Clubley, E. (2001). The Autism-  
551 Spectrum Quotient (AQ): Evidence from Asperger Syndrome/High-Functioning Autism,  
552 Males and Females, Scientists and Mathematicians. *Journal of Autism and Developmental*  
553 *Disorders*, 31, 5–17.

554 Batty, M., & Taylor, M. J. (2003). Early processing of the six basic facial emotional expressions.  
555 *Cognitive Brain Research*, 17(3), 613–620. [https://doi.org/10.1016/S0926-6410\(03\)00174-5](https://doi.org/10.1016/S0926-6410(03)00174-5)

556 Bedwell, J. S., Chan, C. C., Cohen, O., Karbi, Y., Shamir, E., & Rassovsky, Y. (2013). The  
557 magnocellular visual pathway and facial emotion misattribution errors in schizophrenia.  
558 *Progress in Neuro-Psychopharmacology and Biological Psychiatry*, 44, 88–93.  
559 <https://doi.org/10.1016/j.pnpbp.2013.01.015>

560 Bedwell, J. S., Chan, C. C., Trachik, B. J., & Rassovsky, Y. (2013). Changes in the visual-evoked  
561 P1 potential as a function of schizotypy and background color in healthy young adults.  
562 *Journal of Psychiatric Research*, 47(4), 542–547.  
563 <https://doi.org/10.1016/j.jpsychires.2012.12.012>

564 Bedwell, J. S., Miller, L. S., Brown, J. M., & Yanasak, N. E. (2006). SCHIZOPHRENIA AND  
565 RED LIGHT: FMRI EVIDENCE FOR A NOVEL BIOBEHAVIORAL MARKER.  
566 *International Journal of Neuroscience*, 116(8), 881–894.  
567 <https://doi.org/10.1080/00207450500516529>

568 Bedwell, J. S., & Orem, D. M. (2008). The effect of red light on backward masking in individuals  
569 with psychometrically defined schizotypy. *Cognitive Neuropsychiatry*, 13(6), 491–504.  
570 <https://doi.org/10.1080/13546800802605755>

571 Bedwell, J. S., Spencer, C. C., Chan, C. C., Butler, P. D., Sehatpour, P., & Schmidt, J. (2018). The  
572 P1 visual-evoked potential, red light, and transdiagnostic psychiatric symptoms. *Brain*  
573 *Research*, 1687, 144–154. <https://doi.org/10.1016/j.brainres.2018.03.002>

574 Benardete, E. A., & Kaplan, E. (1999a). The dynamics of primate M retinal ganglion cells. *Visual*  
575 *Neuroscience*, 16(2), 355–368. <https://doi.org/10.1017/S0952523899162151>



576 Benardete, E. A., & Kaplan, E. (1999b). Dynamics of primate P retinal ganglion cells: Responses to  
577 chromatic and achromatic stimuli. *The Journal of Physiology*, 519(3), 775–790.  
578 <https://doi.org/10.1111/j.1469-7793.1999.0775n.x>

579 Bentin, S., Allison, T., Puce, A., Perez, E., & McCarthy, G. (1996). Electrophysiological Studies of  
580 Face Perception in Humans. *Journal of Cognitive Neuroscience*, 8(6), 551–565.  
581 <https://doi.org/10.1162/jocn.1996.8.6.551>

582 Blau, V. C., Maurer, U., Tottenham, N., & McCandliss, B. D. (2007). The face-specific N170  
583 component is modulated by emotional facial expression. *Behavioral and Brain Functions*,  
584 3(1), 7. <https://doi.org/10.1186/1744-9081-3-7>

585 Breitmeyer, B. G., & Breier, J. I. (1994). Effects of background color on reaction time to stimuli  
586 varying in size and contrast: Inferences about human M channels. *Vision Research*, 34(8),  
587 1039–1045. [https://doi.org/10.1016/0042-6989\(94\)90008-6](https://doi.org/10.1016/0042-6989(94)90008-6)

588 Burt, A., Hugrass, L., Frith-Belvedere, T., & Crewther, D. (2017). Insensitivity to Fearful Emotion  
589 for Early ERP Components in High Autistic Tendency Is Associated with Lower  
590 Magnocellular Efficiency. *Frontiers in Human Neuroscience*, 11, 495.  
591 <https://doi.org/10.3389/fnhum.2017.00495>

592 Butler, P. D., Zemon, V., Schechter, I., Saperstein, A. M., Hoptman, M. J., Lim, K. O., Revheim,  
593 N., Silipo, G., & Javitt, D. C. (2005). Early-Stage Visual Processing and Cortical  
594 Amplification Deficits in Schizophrenia. *Archives of General Psychiatry*, 62(5), 495.  
595 <https://doi.org/10.1001/archpsyc.62.5.495>

596 Carr, J. A. (2015). I'll take the low road: The evolutionary underpinnings of visually triggered fear.  
597 *Frontiers in Neuroscience*, 9. <https://doi.org/10.3389/fnins.2015.00414>

598 Chase, C., Ashourzadeh, A., Kelly, C., Monfette, S., & Kinsey, K. (2003). Can the magnocellular  
599 pathway read? Evidence from studies of color. *Vision Research*, 43(10), 1211–1222.  
600 [https://doi.org/10.1016/S0042-6989\(03\)00085-3](https://doi.org/10.1016/S0042-6989(03)00085-3)



601 Corbett, B. A., Carmean, V., Ravizza, S., Wendelken, C., Henry, M. L., Carter, C., & Rivera, S. M.  
602 (2009). A functional and structural study of emotion and face processing in children with  
603 autism. *Psychiatry Research: Neuroimaging*, 173(3), 196–205.  
604 <https://doi.org/10.1016/j.psychresns.2008.08.005>

605 Corradi-Dell’Acqua, C., Schwartz, S., Meaux, E., Hubert, B., Vuilleumier, P., & Deruelle, C.  
606 (2014). Neural responses to emotional expression information in high- and low-spatial  
607 frequency in autism: Evidence for a cortical dysfunction. *Frontiers in Human Neuroscience*,  
608 8. <https://doi.org/10.3389/fnhum.2014.00189>

609 Dalton, K. M., Nacewicz, B. M., Johnstone, T., Schaefer, H. S., Gernsbacher, M. A., Goldsmith, H.  
610 H., Alexander, A. L., & Davidson, R. J. (2005). Gaze fixation and the neural circuitry of  
611 face processing in autism. *Nature Neuroscience*, 8(4), 519–526.  
612 <https://doi.org/10.1038/nn1421>

613 de Gelder, B., van Honk, J., & Tamietto, M. (2011). Emotion in the brain: Of low roads, high roads  
614 and roads less travelled. *Nature Reviews Neuroscience*, 12(7), 425–425.  
615 <https://doi.org/10.1038/nrn2920-c1>

616 de Monasterio, F. M. (1978). Properties of concentrically organized X and Y ganglion cells of  
617 macaque retina. *Journal of Neurophysiology*, 41(6), 1394–1417.  
618 <https://doi.org/10.1152/jn.1978.41.6.1394>

619 Derrington, A. M., & Lennie, P. (1984). Spatial and temporal contrast sensitivities of neurones in  
620 lateral geniculate nucleus of macaque. *The Journal of Physiology*, 357(1), 219–240.  
621 <https://doi.org/10.1113/jphysiol.1984.sp015498>

622 Dinsdale, N. L., Hurd, P. L., Wakabayashi, A., Elliot, M., & Crespi, B. J. (2013). How Are Autism  
623 and Schizotypy Related? Evidence from a Non-Clinical Population. *PLoS ONE*, 8(5).  
624 <https://doi.org/10.1371/journal.pone.0063316>

625 Dumas, T., Dubal, S., Attal, Y., Chupin, M., Jouvent, R., Morel, S., & George, N. (2013). MEG  
626 Evidence for Dynamic Amygdala Modulations by Gaze and Facial Emotions. *PLoS ONE*,  
627 8(9), e74145. <https://doi.org/10.1371/journal.pone.0074145>

628 Edwards, V. T., Hogben, John H, Clark, Craig D, & Pratt, Chris. (1996). *Effects of a Red*  
629 *Background on Magnocellular Functioning in Average and Specifically Disabled Readers.*  
630 36, 9.

631 Eimer, M., & Holmes, A. (2002). An ERP study on the time course of emotional face processing:  
632 *Neuroreport*, 13(4), 427–431. <https://doi.org/10.1097/00001756-200203250-00013>

633 Fiorentini, A., Porciatti, V., Morrone, M. C., & Burr, D. C. (1996). Visual Ageing: Unspecific  
634 Decline of the Responses to Luminance and Colour. *Vision Research*, 36(21), 3557–3566.  
635 [https://doi.org/10.1016/0042-6989\(96\)00032-6](https://doi.org/10.1016/0042-6989(96)00032-6)

636 Ford, T. C., & Crewther, D. P. (2014). Factor Analysis Demonstrates a Common Schizoid  
637 Phenotype within Autistic and Schizotypal Tendency: Implications for Neuroscientific  
638 Studies. *Frontiers in Psychiatry*, 5. <https://doi.org/10.3389/fpsyt.2014.00117>

639 Garvert, M. M., Friston, K. J., Dolan, R. J., & Garrido, M. I. (2014). Subcortical amygdala  
640 pathways enable rapid face processing. *NeuroImage*, 102, 309–316.  
641 <https://doi.org/10.1016/j.neuroimage.2014.07.047>

642 Henson, R. N., Goshen-Gottstein, Y., Ganel, T., Otten, L. J., Quayle, A., & Rugg, M. D. (2003).  
643 Electrophysiological and Haemodynamic Correlates of Face Perception, Recognition and  
644 Priming. *Cerebral Cortex*, 13(7), 793–805. <https://doi.org/10.1093/cercor/13.7.793>

645 Hillyard, S. A., & Anllo-Vento, L. (1998). Event-related brain potentials in the study of visual  
646 selective attention. *Proceedings of the National Academy of Sciences*, 95(3), 781–787.  
647 <https://doi.org/10.1073/pnas.95.3.781>

648 Holmes, A., Winston, J. S., & Eimer, M. (2005). The role of spatial frequency information for ERP  
649 components sensitive to faces and emotional facial expression. *Cognitive Brain Research*,  
650 25(2), 508–520. <https://doi.org/10.1016/j.cogbrainres.2005.08.003>

651 John, Y. J., Zikopoulos, B., Bullock, D., & Barbas, H. (2016). The Emotional Gatekeeper: A  
652 Computational Model of Attentional Selection and Suppression through the Pathway from  
653 the Amygdala to the Inhibitory Thalamic Reticular Nucleus. *PLOS Computational Biology*,  
654 12(2), e1004722. <https://doi.org/10.1371/journal.pcbi.1004722>

655 Johnson, M. H. (2005). Subcortical face processing. *Nature Reviews Neuroscience*, 6(10), 766–774.  
656 <https://doi.org/10.1038/nrn1766>

657 Kaplan, E., & Shapley, R. M. (1986). The primate retina contains two types of ganglion cells, with  
658 high and low contrast sensitivity. *Proceedings of the National Academy of Sciences*, 83(8),  
659 2755–2757. <https://doi.org/10.1073/pnas.83.8.2755>

660 Kim, D., Wylie, G., Pasternak, R., Butler, P. D., & Javitt, D. C. (2006). Magnocellular contributions  
661 to impaired motion processing in schizophrenia. *Schizophrenia Research*, 82(1), 1–8.  
662 <https://doi.org/10.1016/j.schres.2005.10.008>

663 Krolak-Salmon, P., Vighetto, A., Bertrand, O., & Mauguiere, F. (2004). Early Amygdala Reaction  
664 to Fear Spreading in Occipital, Temporal, and Frontal Cortex: A Depth Electrode ERP  
665 Study in Human. *Neuron*, 42, 665–676.

666 Kveraga, K., Boshyan, J., & Bar, M. (2007). Magnocellular Projections as the Trigger of Top-Down  
667 Facilitation in Recognition. *Journal of Neuroscience*, 27(48), 13232–13240.  
668 <https://doi.org/10.1523/JNEUROSCI.3481-07.2007>

669 Kwan, W. C., Mundinano, I.-C., de Souza, M. J., Lee, S. C. S., Martin, P. R., Grünert, U., &  
670 Bourne, J. A. (2019). Unravelling the subcortical and retinal circuitry of the primate inferior  
671 pulvinar. *Journal of Comparative Neurology*, 527(3), 558–576.  
672 <https://doi.org/10.1002/cne.24387>

673 Lakatos, P., O’Connell, M. N., & Barczak, A. (2016). Pondering the Pulvinar. *Neuron*, 89(1), 5–7.  
674 <https://doi.org/10.1016/j.neuron.2015.12.022>

- 675 Laycock, R., Crewther, S. G., & Crewther, D. P. (2007). A role for the ‘magnocellular advantage’  
676 in visual impairments in neurodevelopmental and psychiatric disorders. *Neuroscience &*  
677 *Biobehavioral Reviews*, 31(3), 363–376. <https://doi.org/10.1016/j.neubiorev.2006.10.003>
- 678 LeDoux, J. E. *The Emotional Brain* (Simon & Schuster, New York, 1996).
- 679 LeDoux, J. (2003). The Emotional Brain, Fear, and the Amygdala. *Cellular and Molecular*  
680 *Neurobiology*, 12.
- 681 Livingstone, M., & Hubel, D. (1984). Anatomy and physiology of a color system in the primate  
682 visual cortex. *The Journal of Neuroscience*, 4, 309–356.
- 683 Mangun, G. R. (1995). Neural mechanisms of visual selective attention. *Psychophysiology*, 32(1),  
684 4–18. <https://doi.org/10.1111/j.1469-8986.1995.tb03400.x>
- 685 Markram, K., Rinaldi, T., Mendola, D. L., Sandi, C., & Markram, H. (2008). Abnormal Fear  
686 Conditioning and Amygdala Processing in an Animal Model of Autism.  
687 *Neuropsychopharmacology*, 33(4), 901–912. <https://doi.org/10.1038/sj.npp.1301453>
- 688 McCleery, J. P., Allman, E., Carver, L. J., & Dobkins, K. R. (2007). Abnormal Magnocellular  
689 Pathway Visual Processing in Infants at Risk for Autism. *Biological Psychiatry*, 62(9),  
690 1007–1014. <https://doi.org/10.1016/j.biopsych.2007.02.009>
- 691 McFadyen, J., Mermillod, M., Mattingley, J. B., Halász, V., & Garrido, M. I. (2017). A Rapid  
692 Subcortical Amygdala Route for Faces Irrespective of Spatial Frequency and Emotion. *The*  
693 *Journal of Neuroscience*, 37(14), 3864–3874. [https://doi.org/10.1523/JNEUROSCI.3525-](https://doi.org/10.1523/JNEUROSCI.3525-16.2017)  
694 16.2017
- 695 Méndez-Bértolo, C., Moratti, S., Toledano, R., Lopez-Sosa, F., Martínez-Alvarez, R., Mah, Y. H.,  
696 Vuilleumier, P., Gil-Nagel, A., & Strange, B. A. (2016). A fast pathway for fear in human  
697 amygdala. *Nature Neuroscience*, 19(8), 1041–1049. <https://doi.org/10.1038/nn.4324>
- 698 Morris, J. S., DeGelder, B., Weiskrantz, L., & Dolan, R. J. (2001). Differential extrageniculostriate  
699 and amygdala responses to presentation of emotional faces in a cortically blind field. *Brain*,  
700 124(6), 1241–1252. <https://doi.org/10.1093/brain/124.6.1241>

701 Morris, J. S., Friston, K. J., Buchel, C., Young, A. W., Calder, A. J., & Dolan, R. J. (1998). A  
702 neuromodulatory role for the human amygdala in processing emotional facial expressions.  
703 *Brain*, 121(1), 47–57. <https://doi.org/10.1093/brain/121.1.47>

704 Morris, J. S., Ohman, A., & Dolan, R. J. (1999). A subcortical pathway to the right amygdala  
705 mediating “unseen” fear. *Proceedings of the National Academy of Sciences*, 96(4), 1680–  
706 1685. <https://doi.org/10.1073/pnas.96.4.1680>

707 Mundinano, IC., Kwan, W. C., & Bourne, J. A. (2019). Retinotopic specializations of cortical and  
708 thalamic inputs to area MT. *PNAS*, 116, 23326–23331.

709 Nakashima, T., Goto, Y., Abe, T., Kaneko, K., Saito, T., Makinouchi, A., & Tobimatsu, S. (2008).  
710 Electrophysiological evidence for sequential discrimination of positive and negative facial  
711 expressions. *Clinical Neurophysiology*, 119(8), 1803–1811.  
712 <https://doi.org/10.1016/j.clinph.2008.04.014>

713 Nassi, J. J., & Callaway, E. M. (2009). Parallel processing strategies of the primate visual system.  
714 *Nature Reviews Neuroscience*, 10(5), 360–372. <https://doi.org/10.1038/nrn2619>

715 Nummenmaa, L., Engell, A. D., von dem Hagen, E., Henson, R. N. A., & Calder, A. J. (2012).  
716 Autism spectrum traits predict the neural response to eye gaze in typical individuals.  
717 *NeuroImage*, 59(4), 3356–3363. <https://doi.org/10.1016/j.neuroimage.2011.10.075>

718 Öhman, A. (2005). The role of the amygdala in human fear: Automatic detection of threat.  
719 *Psychoneuroendocrinology*, 30(10), 953–958.  
720 <https://doi.org/10.1016/j.psychneuen.2005.03.019>

721 Ohman, A. (2005). The role of the amygdala in human fear: Automatic detection of threat.  
722 *Psychoneuroendocrinology*, 30(10), 953–958.  
723 <https://doi.org/10.1016/j.psychneuen.2005.03.019>

724 Olivares, E. I., Iglesias, J., Saavedra, C., Trujillo-Barreto, N. J., & Valdés-Sosa, M. (2015). Brain  
725 Signals of Face Processing as Revealed by Event-Related Potentials. *Behavioural*  
726 *Neurology*, 2015, 1–16. <https://doi.org/10.1155/2015/514361>

727 Pessoa, L. (2010). Emotion and attention effects: Is it all a matter of timing? Not yet. *Frontiers in*  
728 *Human Neuroscience*, 4. <https://doi.org/10.3389/fnhum.2010.00172>

729 Pessoa, L., & Adolphs, R. (2010). Emotion processing and the amygdala: From a “low road” to  
730 “many roads” of evaluating biological significance. *Nature Reviews Neuroscience*, 11(11),  
731 773–782. <https://doi.org/10.1038/nrn2920>

732 Pourtois, G., Dan, E. S., Grandjean, D., Sander, D., & Vuilleumier, P. (2005). Enhanced extrastriate  
733 visual response to bandpass spatial frequency filtered fearful faces: Time course and  
734 topographic evoked-potentials mapping. *Human Brain Mapping*, 26(1), 65–79.  
735 <https://doi.org/10.1002/hbm.20130>

736 Pourtois, G., Grandjean, D., Sander, D., & Vuilleumier, P. (2004). Electrophysiological Correlates  
737 of Rapid Spatial Orienting Towards Fearful Faces. *Cerebral Cortex*, 14(6), 619–633.  
738 <https://doi.org/10.1093/cercor/bhh023>

739 Purushothaman, G., Marion, R., Li, K., & Casagrande, V. A. (2012). Gating and control of primary  
740 visual cortex by pulvinar. *Nature Neuroscience*, 15(6), 905–912.  
741 <https://doi.org/10.1038/nn.3106>

742 Rossion, B. (2003). A network of occipito-temporal face-sensitive areas besides the right middle  
743 fusiform gyrus is necessary for normal face processing. *Brain*, 126(11), 2381–2395.  
744 <https://doi.org/10.1093/brain/awg241>

745 Rossion, Bruno. (2014). Understanding face perception by means of human electrophysiology.  
746 *Trends in Cognitive Sciences*, 18(6), 310–318. <https://doi.org/10.1016/j.tics.2014.02.013>

747 Ruzich, E., Allison, C., Smith, P., Watson, P., Auyeung, B., Ring, H., & Baron-Cohen, S. (2015).  
748 Measuring autistic traits in the general population: A systematic review of the Autism-  
749 Spectrum Quotient (AQ) in a nonclinical population sample of 6,900 typical adult males and  
750 females. *Molecular Autism*, 6(1), 2. <https://doi.org/10.1186/2040-2392-6-2>

751 Silverstein, D. N., & Ingvar, M. (2015). A multi-pathway hypothesis for human visual fear  
752 signaling. *Frontiers in Systems Neuroscience*, 9. <https://doi.org/10.3389/fnsys.2015.00101>

753 Stein, T., Seymour, K., Hebart, M. N., & Sterzer, P. (2014). Rapid Fear Detection Relies on High  
754 Spatial Frequencies. *Psychological Science*, 25(2), 566–574.  
755 <https://doi.org/10.1177/0956797613512509>

756 Tabachnick BG, & Fidell LS. *Using Multivariate Statistics*. 6 ed. Boston: Allyn and Bacon (2013)

757 Mundinano, IC., Kwan, W. C., & Bourne, J. A. (2019). Retinotopic specializations of  
758 cortical and thalamic inputs to area MT. *PNAS*, 116, 23326–23331.

759 Tadayonnejad, R., Klumpp, H., Ajilore, O., Leow, A., & Phan, K. L. (2016). Aberrant pulvinar  
760 effective connectivity in generalized social anxiety disorder. *Medicine*, 95(45).  
761 <https://doi.org/10.1097/MD.0000000000005358>

762 Tadel, F., Baillet, S., Mosher, J. C., Pantazis, D., & Leahy, R. M. (2011). Brainstorm: A User-  
763 Friendly Application for MEG/EEG Analysis. *Computational Intelligence and*  
764 *Neuroscience*, 2011, 1–13. <https://doi.org/10.1155/2011/879716>

765 Tamietto, M., Pullens, P., de Gelder, B., Weiskrantz, L., & Goebel, R. (2012). Subcortical  
766 Connections to Human Amygdala and Changes following Destruction of the Visual Cortex.  
767 *Current Biology*, 22(15), 1449–1455. <https://doi.org/10.1016/j.cub.2012.06.006>

768 Tottenham, N., Tanaka, J. W., Leon, A. C., McCarry, T., Nurse, M., Hare, T. A., Marcus, D. J.,  
769 Westerlund, A., Casey, B., & Nelson, C. (2009). The NimStim set of facial expressions:  
770 Judgments from untrained research participants. *Psychiatry Research*, 168(3), 242–249.  
771 <https://doi.org/10.1016/j.psychres.2008.05.006>

772 Vlamings, P. H. J. M., Goffaux, V., & Kemner, C. (2009). Is the early modulation of brain activity  
773 by fearful facial expressions primarily mediated by coarse low spatial frequency  
774 information? *Journal of Vision*, 9(5), 12–12. <https://doi.org/10.1167/9.5.12>

775 Vuilleumier, P., Armony, J. L., Driver, J., & Dolan, R. J. (2003). Distinct spatial frequency  
776 sensitivities for processing faces and emotional expressions. *Nature Neuroscience*, 6(6),  
777 624–631. <https://doi.org/10.1038/nn1057>



778 West, G. L., Anderson, A. K., Bedwell, J. S., & Pratt, J. (2010). Red Diffuse Light Suppresses the  
779 Accelerated Perception of Fear. *Psychological Science*, 21(7), 992–999.  
780 <https://doi.org/10.1177/0956797610371966>

781 Wiesel, T. N., & Hubel, D. H. (1966). Spatial and chromatic interactions in the lateral geniculate  
782 body of the rhesus monkey. *Journal of Neurophysiology*, 29, 1115–1156.  
783  
784  
785  
786  
787  
788  
789  
790  
791  
792
